# Supplementary material for: Murine muscle stem cell response to perturbations of the neuromuscular junction are attenuated with aging
Source: eLife journal article supplement (doi:10.7554/elife.66749), 2021-07-29
Supplement: supp [file elife-66749-supp-v1.zip]

A

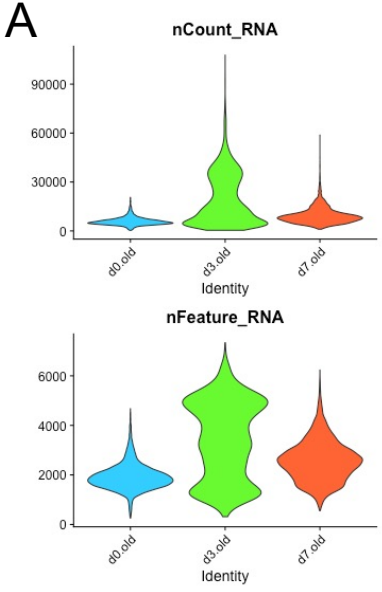

B

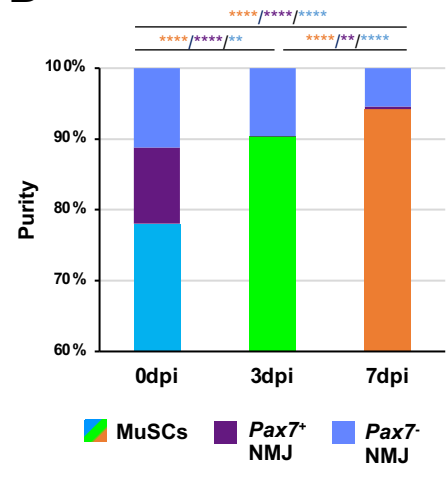

C

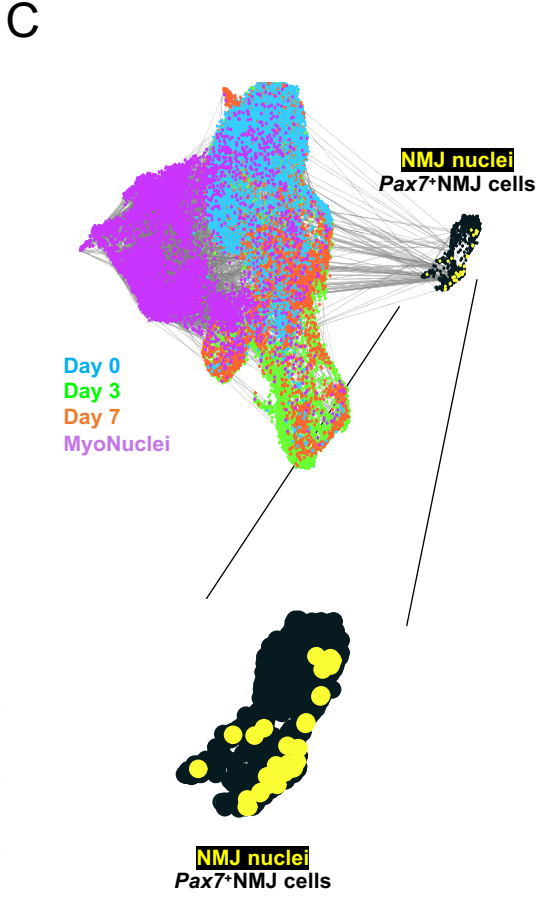

**Figure 4 – figure supplement 1.** A) Violin plot of the number of unique molecular identifiers (top) and number of genes (bottom) in each dataset. B) Stacked bar graph showing Pax7- NMJ, Pax7+ NMJ, and MuSCs as a percent of FACS-enriched MuSCs. \*\*\*\* denotes  $p < 0.0001$  and \*\* denotes  $p < 0.01$  by two-sided z-test for proportions with pairwise comparisons using holm p-value adjustment. Threshold for significance was considered  $p < 0.05$ . Sample sizes (n) were 5951, 6404, and 6264 for 0dpi, 3dpi, and 7dpi, respectively. Orange asterisk indicates comparison of MuSCs, purple indicates comparison of Pax7+ NMJ cells, and blue indicates comparison of Pax7- NMJ cells. (C) (left) UMAP colored by timepoint showing velocity-inferred cell-cell connections (grey lines), which suggests a decision to acquire a synaptic fate. (right) Expanded view of the NMJ cluster showing Pax7+ NMJ cells (black) and Pax7+ NMJ myonuclei (yellow), which originate from the snRNA-Seq datasets. Blue, orange and green points represent Pax7-NMJ cells recovered in the time course datasets.
