# Supplementary material for: Murine muscle stem cell response to perturbations of the neuromuscular junction are attenuated with aging
Source: eLife journal article supplement (doi:10.7554/elife.66749), 2021-07-29
Supplement: supp [file elife-66749-supp-v1.zip]

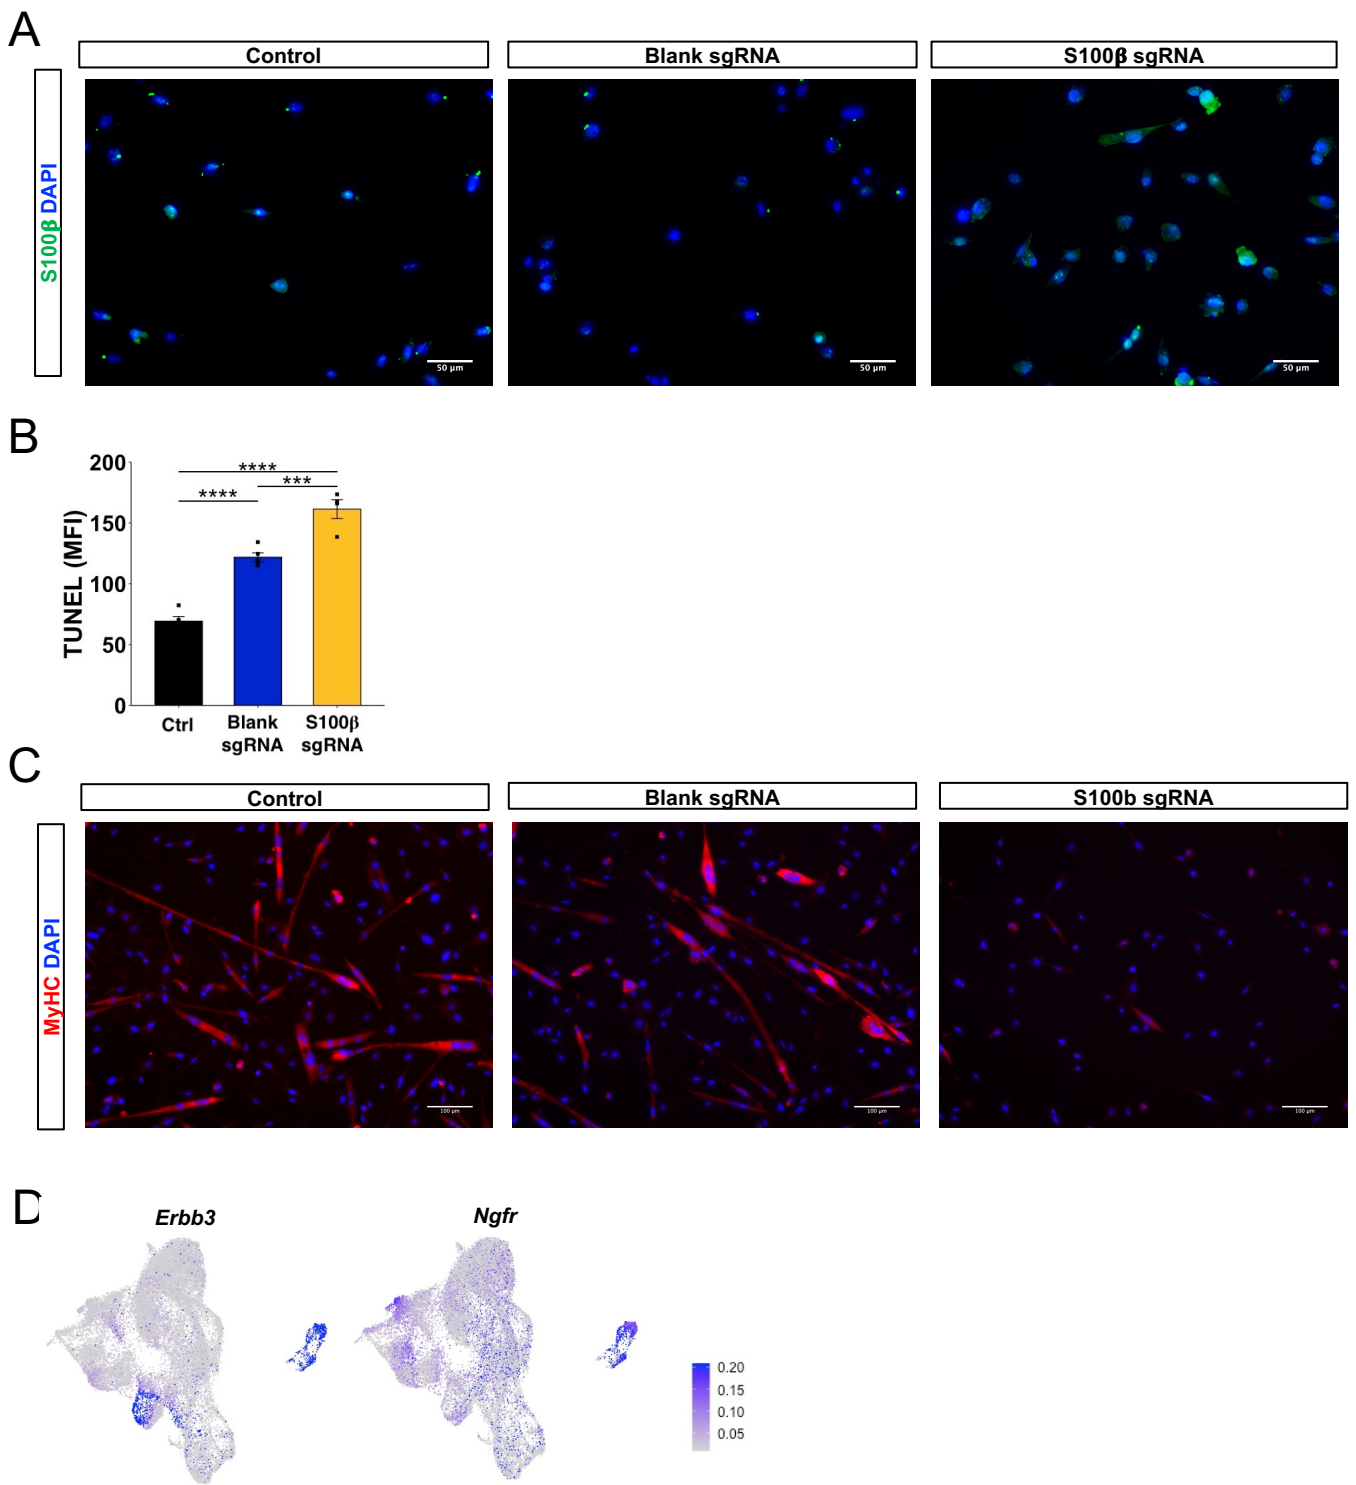

**Figure 6 – figure supplement 1.** A) Representative immunofluorescence images of untransfected myoblasts (Control), myoblasts transfected with an empty vector (Blank sgRNA), and myoblasts transfected with an S100b sgRNA-containing plasmid. Cells are stained with DAPI (blue) and S100β (green). B) Quantification of mean fluorescent intensity (MFI) TUNEL signal for untransfected cells (Ctrl) and cells transfected with Blank sgRNA or S100b sgRNA. Sample sizes were 4 culture wells, each with > 100 cells. \*\*\*p < 0.001 and \*\*\*\*p < 0.0001 by one-way ANOVA and Tukey post-hoc test. C) Representative immunofluorescence images of control cells and cells transfected with Blank sgRNA or S100b sgRNA. Cells are stained with DAPI (blue) and MyHC (red). (D) UMAP gene expression overlays of expression of neurotrophic receptors *Erbb3* and *Ngfr* on the NMJ cluster.
