# Supplementary material for: Murine muscle stem cell response to perturbations of the neuromuscular junction are attenuated with aging
Source: eLife journal article supplement (doi:10.7554/elife.66749), 2021-07-29
Supplement: supp [file elife-66749-supp-v1.zip]

A

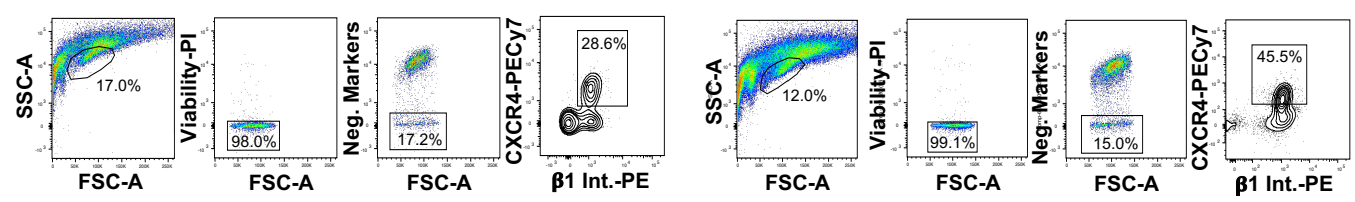

B

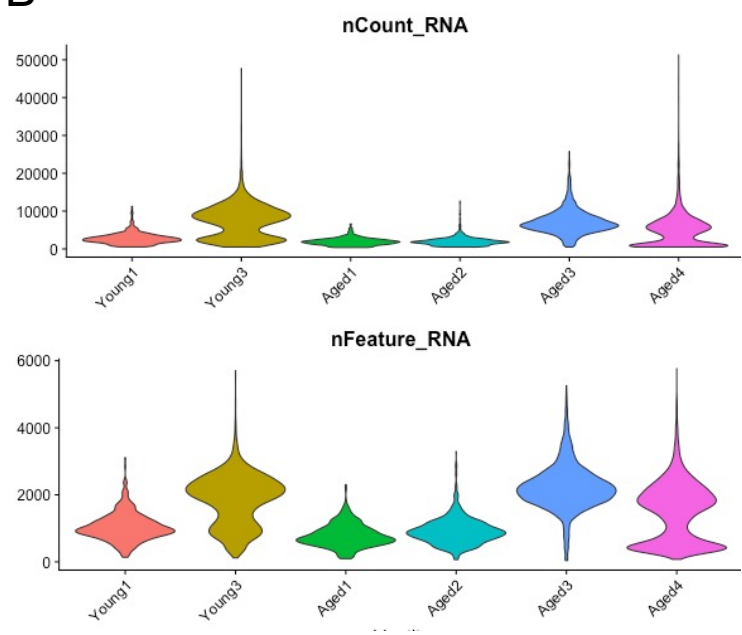

C

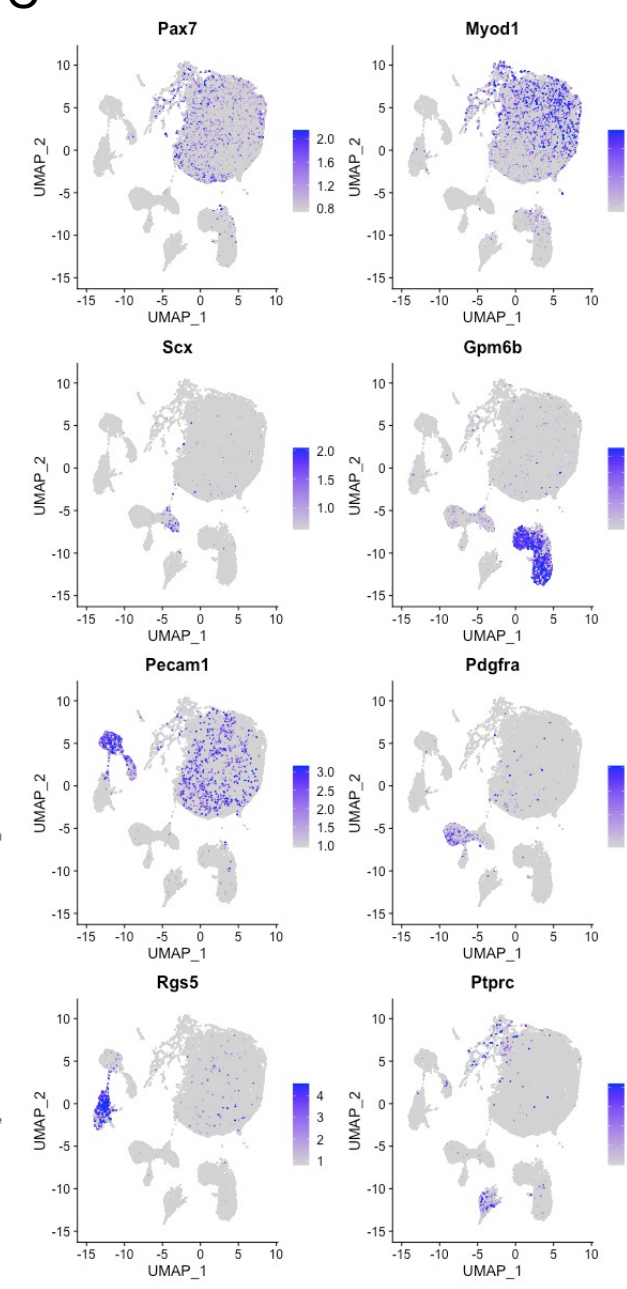

D

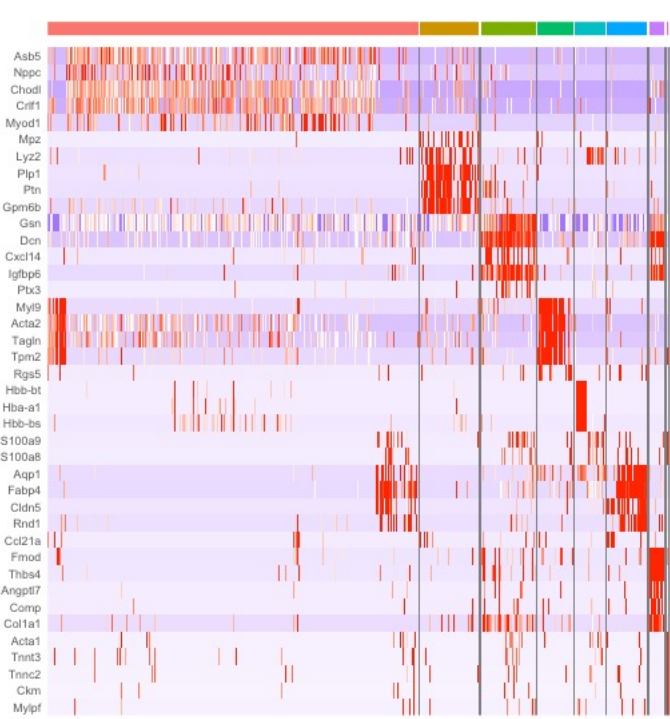

**Figure 3 – figure supplement 1.** A) Representative FACS scatter plots showing gating of MuSCs based on negative (Sca-1, Mac-1, CD31, CD45, Ter-119) and positive (CXCR4, B1-integrin) markers. B) (top) Violin plot of the number of unique molecular identifiers (UMIs) recovered in each dataset. (bottom) Violin plot of the number of genes recovered in each dataset. C) Markergene overlays of UMAP reduction of young MuSCs, aged MuSCs, and Tabula Muris Senis limb muscle cells. D) Heatmap of top 5 differentially expressed genes across cell types.
