# Supplementary material for: Murine muscle stem cell response to perturbations of the neuromuscular junction are attenuated with aging
Source: eLife journal article supplement (doi:10.7554/elife.66749), 2021-07-29
Supplement: supp [file elife-66749-supp-v1.zip]

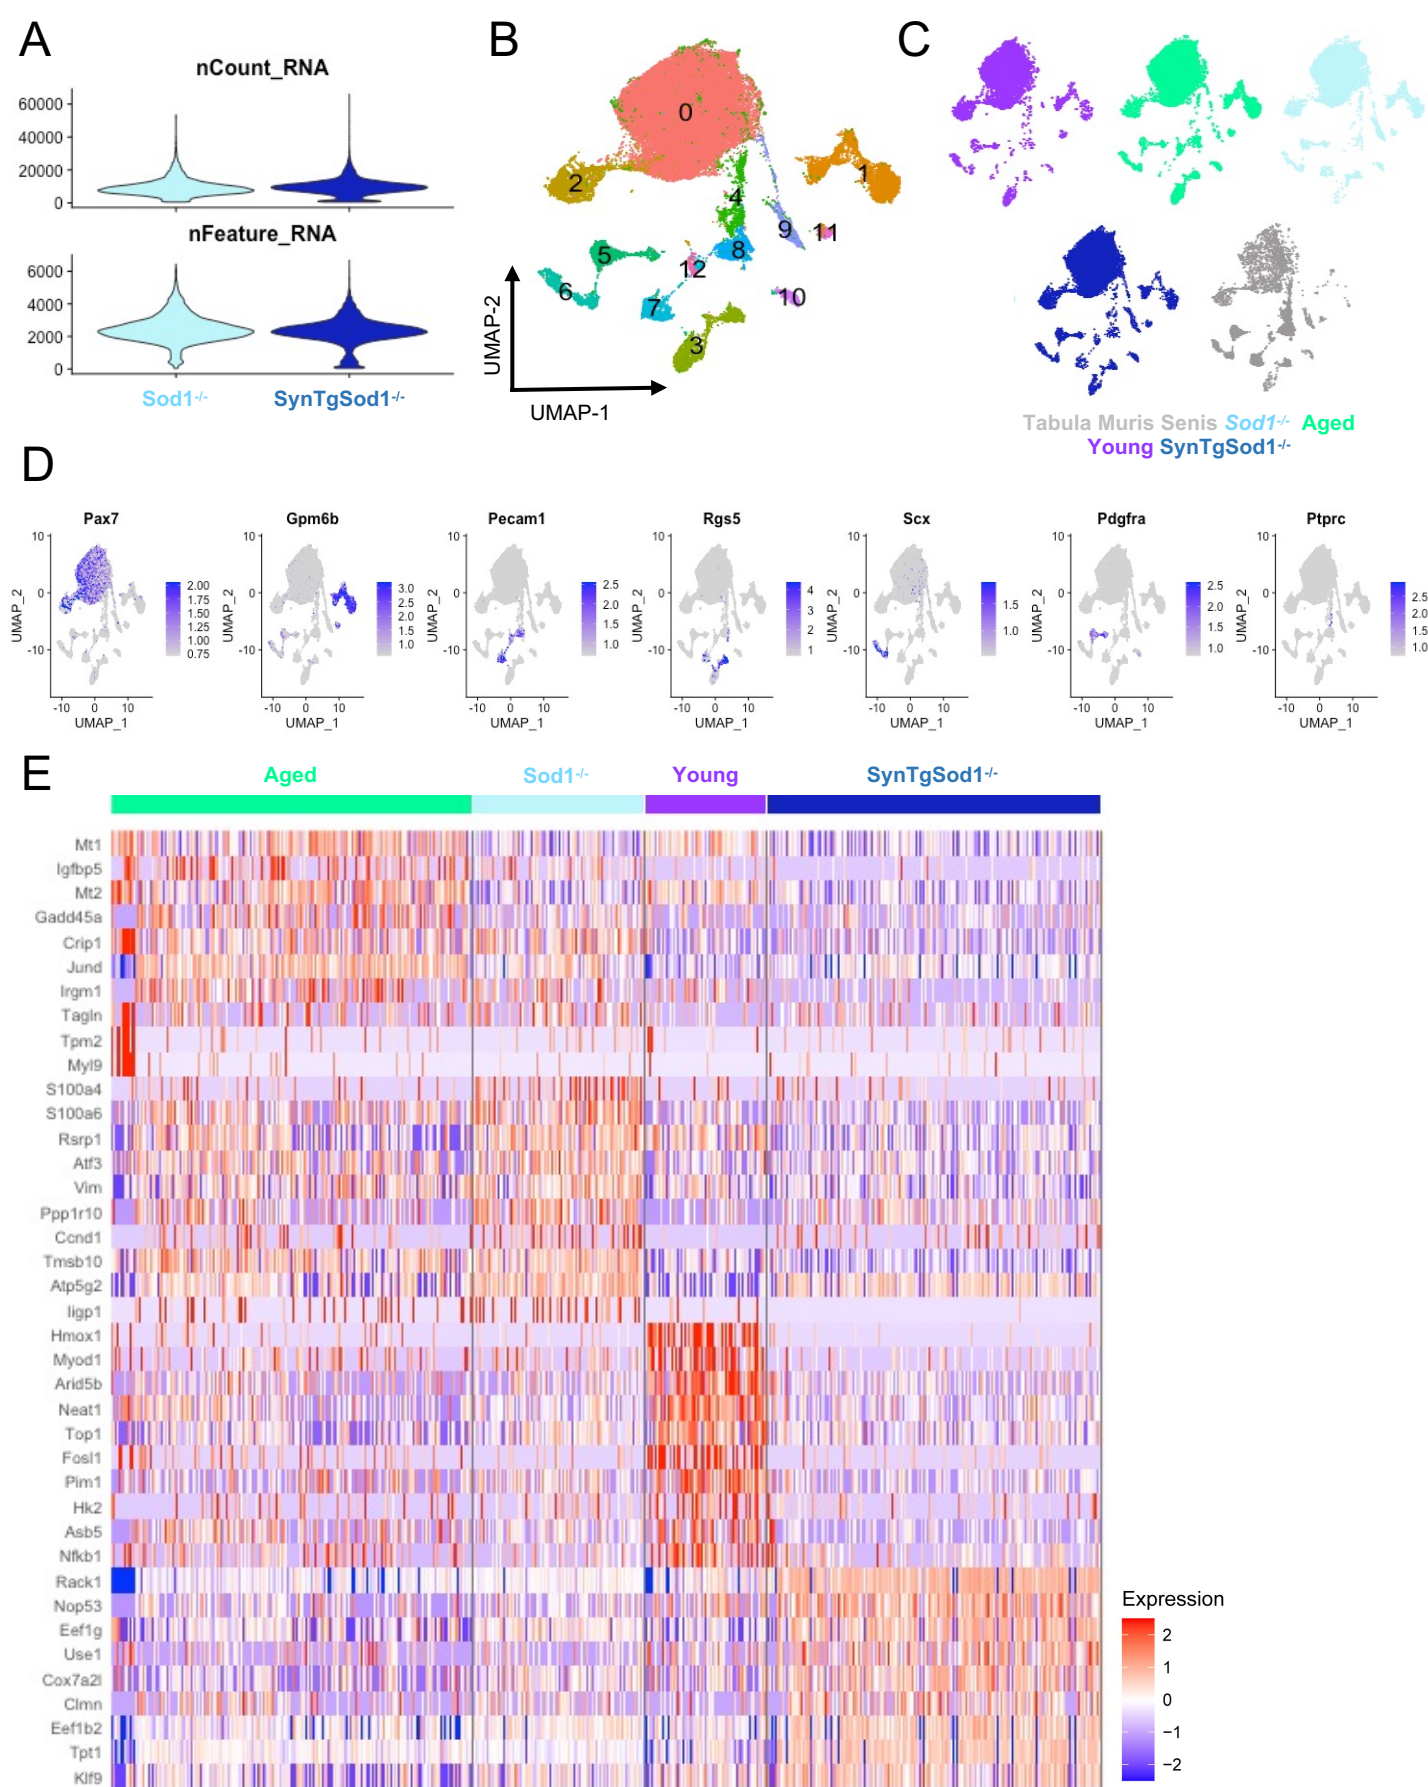

**Figure 5 – figure supplement 1.** A) Violin plots of the number of UMIs (top) and number of genes (bottom) recovered in each dataset. B) UMAP overlay colored by Louvain cluster at a resolution of 0.1. C) Plots split by sample type showing contribution to UMAP. D) UMAP overlays of marker gene expression for the various cell types recovered. E) Heatmap of top 10 differentially expressed genes across aged, young, *Sod1*<sup>-/-</sup>, and *SynTgSod1*<sup>-/-</sup> MuSCs. Differential gene expression testing was calculated only on cells from the MuSC clusters (labeled 0 and 2 in Supp Fig 5B).
