# Supplementary material for: Murine muscle stem cell response to perturbations of the neuromuscular junction are attenuated with aging
Source: eLife journal article supplement (doi:10.7554/elife.66749), 2021-07-29
Supplement: supp [file elife-66749-supp-v1.zip]

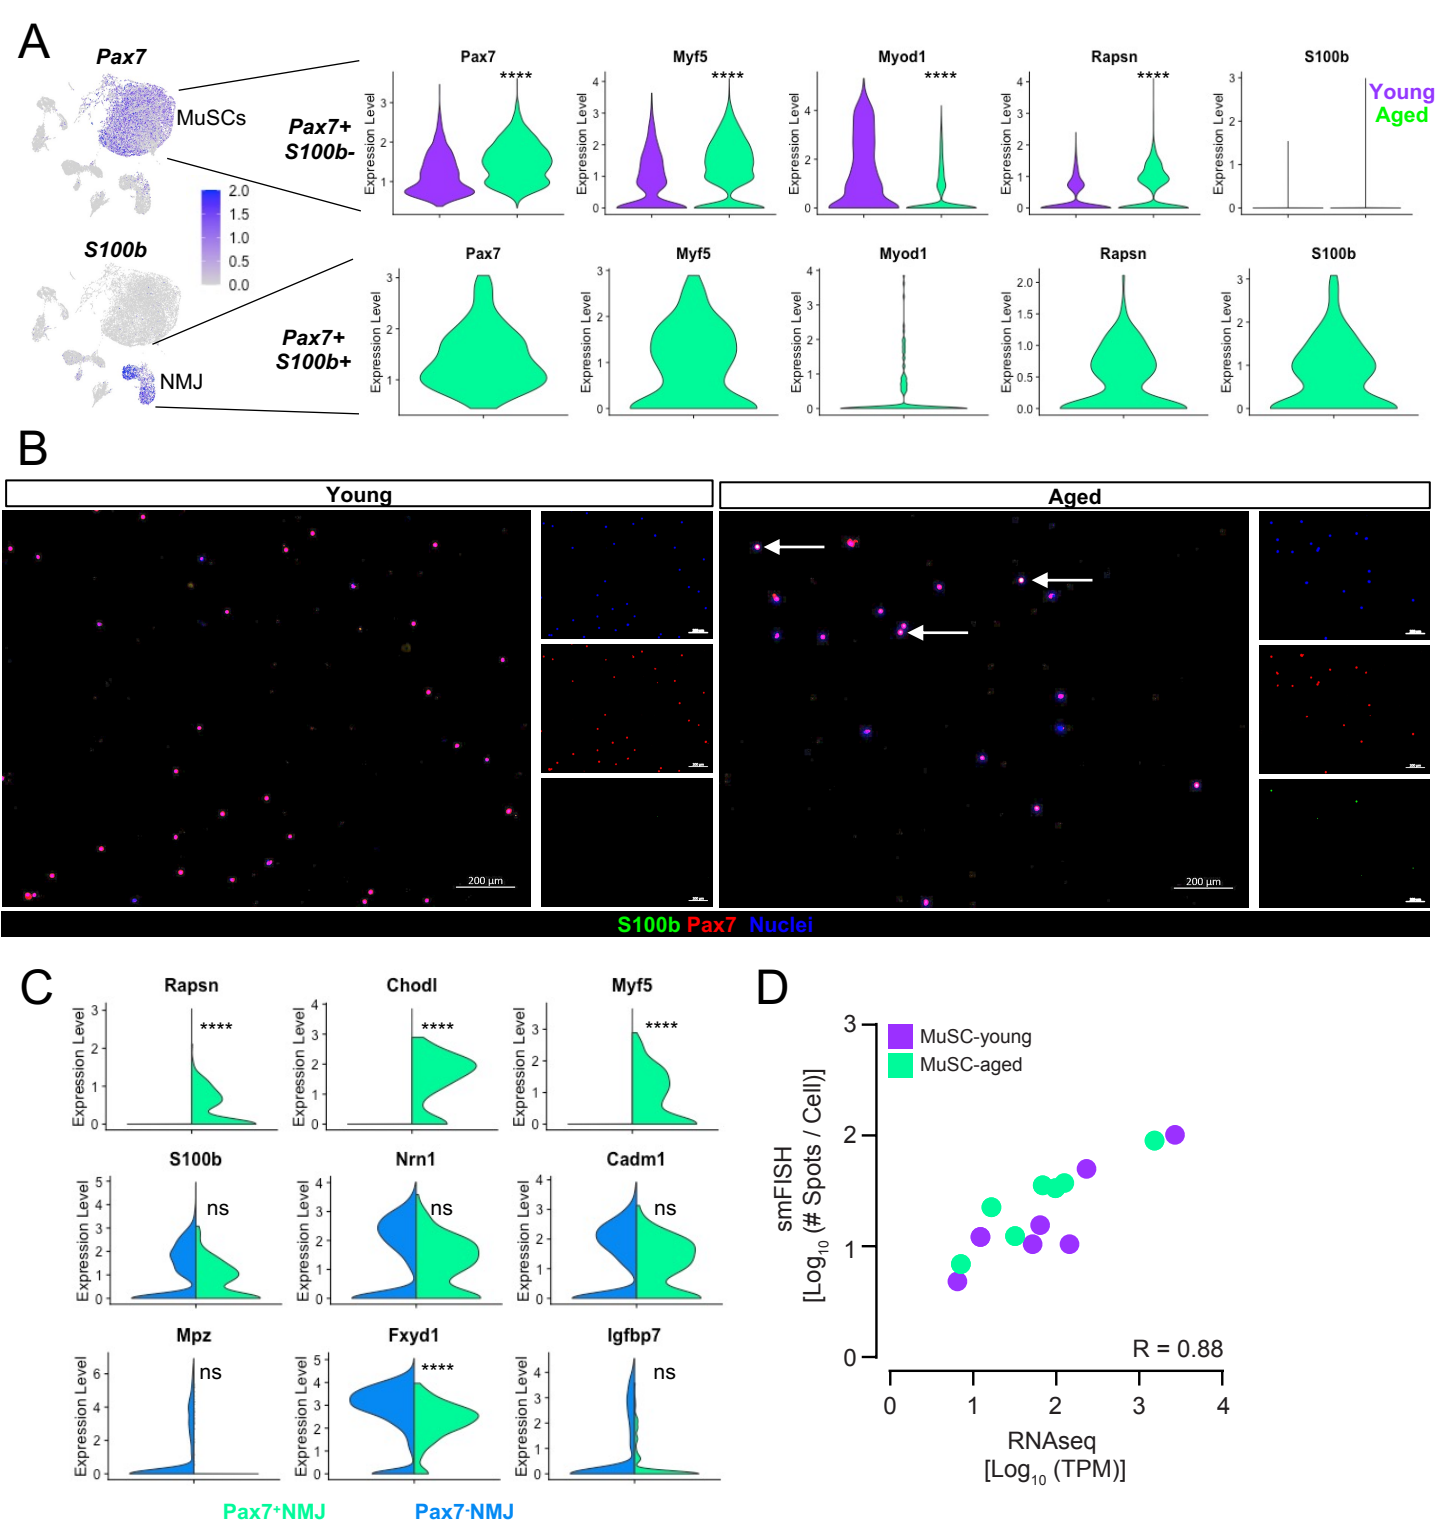

**Figure 3 – figure supplement 2.** A) Plots of myogenic regulatory factor and rapsyn expression in *Pax7*+*S100b*+ cells and *Pax7*+*S100b*- cells in cells enriched from young versus aged animals. Cells were filtered into groups based on raw expression greater than 0. (*Myog* and *Pax7* were not co-expressed among scRNA-Seq libraries). Not enough *Pax7*+*S100b*+ cells were captured by scRNA-Seq to include in the violin plots. \*\*\*\* $p < 0.0001$  by Wilcox Sum Rank Test with Bonferroni correction for multiple testing. B) Representative IF images of *Pax7* and *S100b* expression in MuSCs sorted from young and aged muscles. Scale bar indicates 200um. Arrows point to *Pax7*+*S100b*+ cells. Quantifications of *Pax7* and *S100b* expression are included in Figure 3C. C) Split violin plots comparing gene expression across *Pax7*+ and *Pax7*- cells in the NMJ cluster based on whether raw counts were greater than 0 (*Pax7*+) or equal to zero (*Pax7*-). \*\*\*\* $p < 0.0001$  by Wilcoxon Sum Rank test with Bonferroni correction for multiple comparison. Ns denotes not significant. D) Correlation between RNA levels as measured by smFISH and RNAseq. R, correlation coefficient.
