# Supplementary material for: Murine muscle stem cell response to perturbations of the neuromuscular junction are attenuated with aging
Source: eLife journal article supplement (doi:10.7554/elife.66749), 2021-07-29
Supplement: supp [file elife-66749-supp-v1.zip]

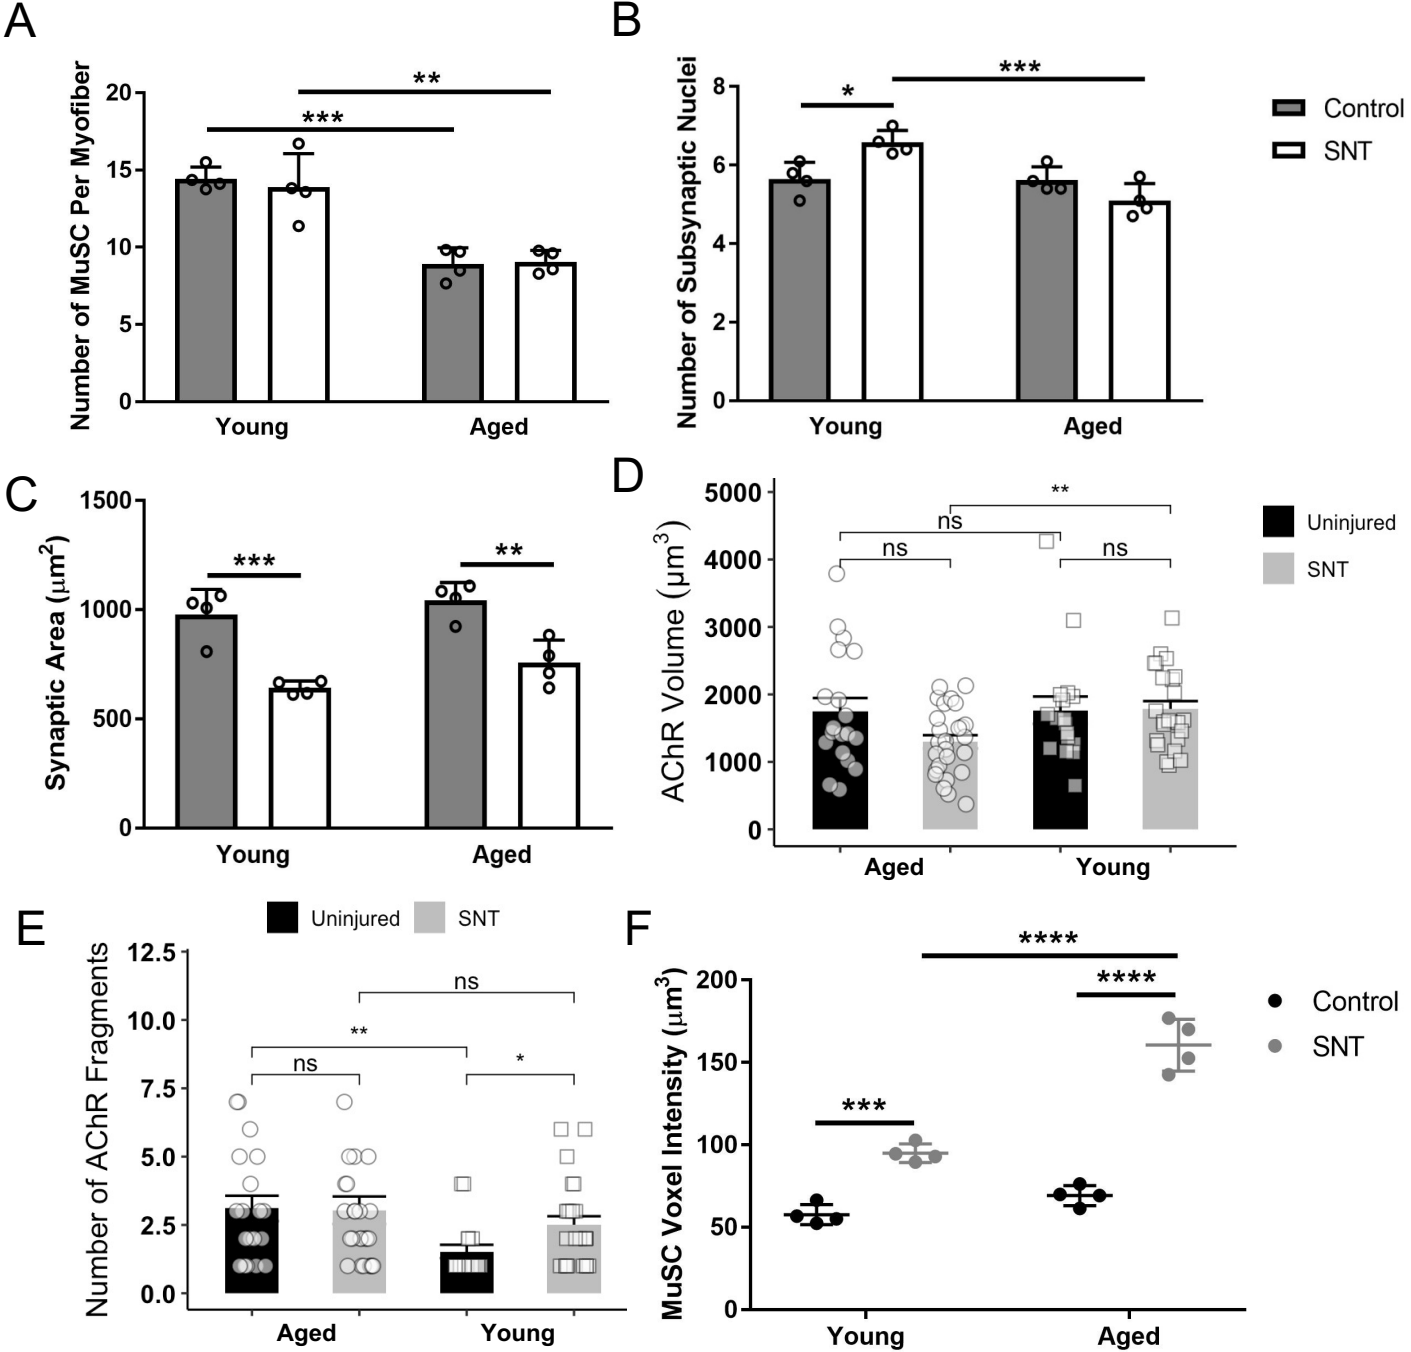

**Figure 2 – figure supplement 1.** A) Total number of muscle stem cells along the entire length of myofibers isolated uninjured control and sciatic nerve transection (SNT) tibialis anterior (TA) muscles from young (2-3 mos.) and aged (20-22 mos.) Pax7-tdTomato mice. Myofibers were isolated with the myotendinous junctions attached at each end to ensure the entire length of the fiber was isolated. Data represents the mean of 4 biological samples for each group, and at least 10 myofibers were quantified from each sample. \*\*  $p < 0.01$ , \*\*\*  $p < 0.001$ . B) Total number of myonuclei within each synapse from isolated myofibers of uninjured control and SNT (TA) muscles from young and aged mice. Data represents the mean of 4 biological samples for each group, with 10 synapses quantified per group. \*  $p < 0.05$ , \*\*\*  $p < 0.001$ . C) Area ( $\mu\text{m}^2$ ) of synapses from z-stack confocal images of uninjured control and SNT TA muscles from young and aged mice. Data represents the mean of 4 biological samples for each group, with 10 synapses measured per group. Data were analyzed with a 2-way ANOVA with Tukey post-hoc test. \*\*  $p < 0.01$ , \*\*\*  $p < 0.001$ . D) AChR voxel volume ( $\mu\text{m}^3$ ) per NMJ was quantified in fiber bundles from uninjured and SNT-injured young and aged mice ( $n=17-26$  NMJs per group). Comparisons were made with a two-sided, unpaired t-test. \*\*  $p < 0.01$ , n.s.  $p > 0.05$ . E) The number of AChR fragments per NMJ were quantified in fiber bundles from uninjured and SNT-injured young and aged mice ( $n=17-26$  NMJs per group). Comparisons were made with a Mann-Whitney U Test. \*  $p < 0.05$ , \*\*  $p < 0.01$ , n.s.  $p > 0.05$ . F) MuSC Voxel volumes from isolated myofibers of uninjured and control SNT TA muscles from young and aged mice.  $n = 4$  mice, with at least 16 MuSCs near the NMJ quantified from each biological replicate. Data were analyzed with a 2-way ANOVA with Tukey post-hoc test. \*\*\*  $p < 0.001$ , \*\*\*\*  $p < 0.0001$ .
