# Supplementary material for: Murine muscle stem cell response to perturbations of the neuromuscular junction are attenuated with aging
Source: eLife journal article supplement (doi:10.7554/elife.66749), 2021-07-29
Supplement: supp [file elife-66749-supp-v1.zip]

A

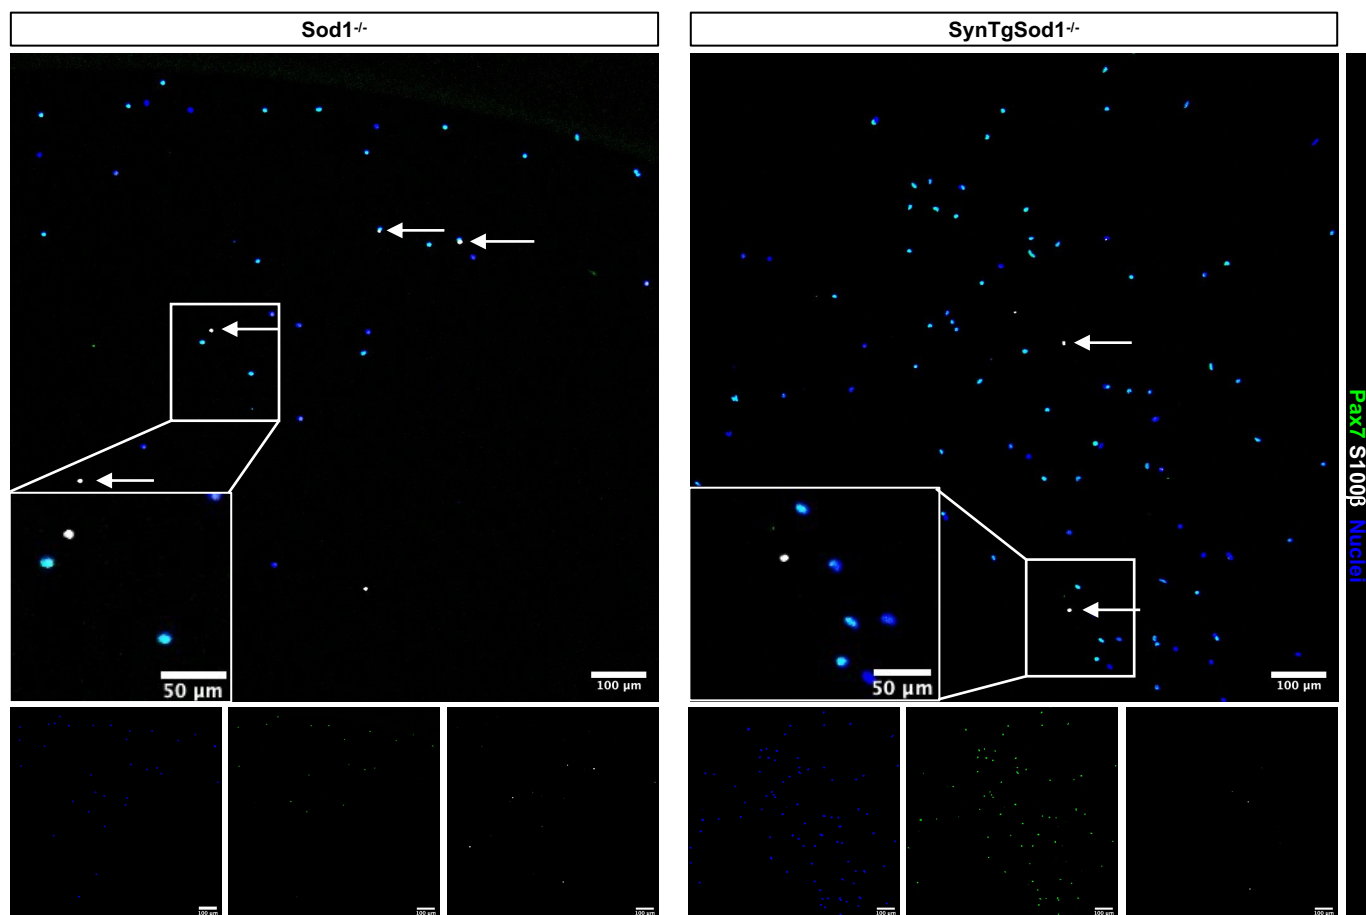

**Figure 5 – figure supplement 2.** A) Representative IF images of Pax7 and S100β expression in MuSCs sorted from *Sod1*<sup>-/-</sup> and *SynTgSod1*<sup>-/-</sup> muscles. Scale bar indicates 100 μm for full size images and 50 μm for insets. Arrows point to Pax7+S100β+ cells. Image quantifications are shown in Figure 5e.
